# Supplementary material for: Autophagy inhibition overcomes multiple mechanisms of resistance to BRAF inhibition in brain tumors
Source: eLife. 2017 Jan 17;6:e19671. doi: 10.7554/eLife.19671 (PMC5241115; doi:10.7554/eLife.19671)
Supplement: Figure 1—source data 1. — DOI: http://dx.doi.org/10.7554/eLife.19671.004 [file elife-19671-fig1-data1.xlsx]

## Sheet: Sheet1
Figure 1A Source Data
	Media									Vem (1um)									Vem (2uM)									Vem (3uM)
794	109.326	112.927	90.199	104.076	103.85	82.548	106.926	107.076	83.073	34.729	39.005	28.616	34.617	37.88	27.866	34.992	39.867	29.216	27.453	34.804	28.204	27.078	34.542	27.866	26.553	34.992	28.729	18.565	17.852	16.84	19.24	17.59	18.19	19.202	17.627	17.852
794R	99.238	100.694	100.778	98.818	100.162	100.414	99.014	100.078	100.806	92.1	98.622	93.303	91.176	99.294	92.715	91.428	99.238	93.275	80.454	100.974	96.886	78.607	100.554	96.607	76.423	101.086	96.635	57.471	64.218	87.481	63.21	68.333	88.964	74.1	66.205	85.661
AM38	98.498	92.922	112.596	94.14	95.486	107.277	95.101	93.243	110.738	49.794	39.925	72.415	48.768	39.604	72.223	49.858	40.629	72.736	23.199	42.936	38.515	23.199	42.936	39.604	23.07	43.449	38.194	41.975	31.722	36.464	43.577	31.786	37.81	44.154	31.914	36.144
AM38R	92.735	99.458	108.55	91.933	99.563	105.798	94.163	101.304	106.495	76.292	96.811	105.938	74.759	96.741	105.973	75.316	97.229	107.819	76.222	84.06	112.069	78.905	84.165	110.571	79.636	84.095	110.815	86.743	83.189	87.823	87.683	86.847	91.446	86.708	84.026	86.464
