# Supplementary material for: Autophagy inhibition overcomes multiple mechanisms of resistance to BRAF inhibition in brain tumors
Source: eLife. 2017 Jan 17;6:e19671. doi: 10.7554/eLife.19671 (PMC5241115; doi:10.7554/eLife.19671)
Supplement: Figure 2—source data 1. — DOI: http://dx.doi.org/10.7554/eLife.19671.006 [file elife-19671-fig2-data1.xlsx]

## Sheet: Sheet1
Figure 2A
	794			794 R			AM38			AM38 R			BT40			BT16 (WT)			B76 (V600E)
Media	1	1	1	1	1	1	1	1	1	1	1		1	1		1	1	1	1	1	1
EBSS	1.98627	1.98616	1.987	1.84784	1.91582	1.48782	1.11445	1.15543	1.135	1.28767	1.24198	1.265	1.59927	1.59927	1.61	1.03678	1.07491	1.15	1.38413	1.43504	1.33502
Figure 2d
	Media			1h			2h			4h			6h
794	1	1	1	1.20999	1.78999	1.7154	1.51739	2.58152	2.58719	2.52109	5.16168	4.75377	3.76549	4.5176	4.72972
794R	1	1	1	1.61791	2.05147	0.544315	2.30206	3.47232	1.83062	2.73851	5.18888	2.54216	4.51667	5.20185	2.51618
AM38	1	1	1	1.01249	1.75984	1.36419	2.01728	2.4745	1.68077	2.65384	3.50752	1.83546	5.54993	5.6063	3.49492
AM38R	1	1	1	2.03125	0.958121	1.19677	1.69192	1.15824	1.30674	2.28893	1.68169	2.20879	2.39163	1.63297	2.19213
