# Supplementary material for: Autophagy inhibition overcomes multiple mechanisms of resistance to BRAF inhibition in brain tumors
Source: eLife. 2017 Jan 17;6:e19671. doi: 10.7554/eLife.19671 (PMC5241115; doi:10.7554/eLife.19671)
Supplement: Figure 3—source data 1. — DOI: http://dx.doi.org/10.7554/eLife.19671.008 [file elife-19671-fig3-data1.xlsx]

## Sheet: Sheet1
Figure 3A Source Data
	Media									CQ 2.5um									CQ 5uM									CQ 10uM
794	71.576	75.673	85.322	101.25	100.761	97.989	70.435	95.732	93.235	71.576	70.272	70.761	75	75.652	76.141	82.989	79.891	80.543	41.739	40.435	41.087	43.859	43.859	43.37	41.25	40.272	40.435	17.283	16.957	16.467	19.728	19.402	19.728	17.609	17.609	17.609
794R	60.803	60.208	60.059	140.932	141.08	136.918	110.918	95.665	91.279	43.409	44.004	44.301	94.103	93.508	87.859	79.534	78.345	77.156	22.894	22.745	22.299	17.839	17.542	17.691	27.502	27.056	27.205	14.866	14.569	14.718	16.056	15.61	15.61	15.758	15.61	15.61
AM38	105.731	108.954	107.584	95.335	99.525	96.302	96.383	96.221	93.965	41.664	42.631	42.631	91.547	92.353	91.386	106.617	104.844	106.375	34.008	34.33	34.491	60.199	59.957	61.005	72.851	72.69	73.335	8.784	9.026	8.703	9.67	9.509	9.67	11.766	11.363	11.605
AM38R	94.268	92.058	92.972	100.135	100.898	101.126	105.775	107.68	105.089	59.898	56.926	56.85	88.933	89.009	88.704	81.846	79.255	78.874	41.685	41.685	38.865	47.934	48.086	47.782	40.999	40.008	40.237	10.974	11.583	11.431	11.888	12.041	12.117	11.355	11.202	11.279
Figure 3C Source Data
	Media																											1uM Vem																		CQ 5uM
794	93.926	94.871	93.259	98.264	99.098	96.54	107.773	110.442	105.827	100.587	96.1609	94.2498	103.202	101.693	102.045	100.235	101.039	100.788	76.3451	95.4696	134.254	75.1211	94.8576	127.216	74.8151	93.3277	128.593	14.348	14.514	14.459	19.686	19.797	20.02	14.236	14.292	14.181	15.4401	15.8927	15.4904	18.4074	18.2565	18.6086	17.15	17.3009	17.2506	67.9	66.399	67.011	69.68
794R	98.2458	98.9192	98.7695	107.674	109.282	107.599	92.1101	93.7936	93.6066	97.9889	97.876	99.6822	101.677	100.36	99.3812	101.187	100.962	100.886	120.015	99.2833	79.2424	122.319	102.739	78.0906	118.403	101.126	78.7817	74.9376	78.0803	79.2027	93.1202	94.7664	92.4842	86.8349	85.488	86.4608	88.0545	90.4252	91.366	88.7695	88.3179	91.2155	85.1194	85.1194	86.0225	60.6086	60.7208	61.3568	72.2439
AM38	92.658	91.844	94.054	98.591	99.987	98.417	108.305	109.817	106.327	98.9293	100.225	101.043	99.0983	100.789	100.451	99.211	99.9437	100.31	103.181	106.849	99.7006	100.225	106.774	94.8353	94.012	102.208	92.2156	20.649	22.394	22.103	24.779	24.837	24.837	20.533	20.94	20.765	5.0155	9.01662	18.8786	4.95914	9.07298	18.9067	5.18456	9.32657	19.0194	66.774	64.797	67.996	64.041
AM38R	108.493	108.791	110.876	96.6371	96.0413	96.6371	94.7306	93.9561	93.8369	99.644	100.313	99.6719	98.8919	100.731	99.8391	99.9783	101.065	99.8669	97.5501	95.6263	104.535	97.5205	97.5205	104.594	99.1779	98.438	105.038	53.3828	56.3617	55.6468	44.5651	45.6375	43.9693	60.1152	56.8979	56.8979	79.4478	86.1892	69.8093	79.0021	84.9078	70.3665	78.3614	86.8577	68.4444	77.2144	79.7763	76.0824	76.976
[truncated: 41 more columns]
