# Supplementary material for: Autophagy inhibition overcomes multiple mechanisms of resistance to BRAF inhibition in brain tumors
Source: eLife. 2017 Jan 17;6:e19671. doi: 10.7554/eLife.19671 (PMC5241115; doi:10.7554/eLife.19671)
Supplement: Figure 4—source data 1. — (D) Quantification of clonogenic growth assays of 794 and AM38 parental and vemurafenib resistant cells treated with either increasing doses of trametinib, or with trametinib, CQ or a combination of the two drugs. DOI: http://dx.doi.org/10.7554/eLife.19671.011 [file elife-19671-fig4-data1.xlsx]

## Sheet: Sheet1
Figure 3A Source Data			794			794					AM38			AM38			AM38			AM38
	Hours	Resistant			Resistant + Tram 5nM				Hours	Parental			Parental + Tram 5nM			Resistant			Resistant + Tram 5nM
	0	100	100	100	100	100	100		0	100	100	100	100	100	100	100	100	100	100	100	100
	24	118.987	120	131.035	141.667	125.743	133.705		24	77.918	76.0369	92.5742	42.0195	48.8959	59.2886	151.312	159.392	151.226	161.975	163.01	157.817
	36	135.443	135.294	98.8505	144.048	146.535	145.291		36	178.233	220.277	261.386	174.593	162.145	199.209	228.863	235.912	211.717	264.197	253.316	234.808
	40	134.177	130.588	101.149	136.905	160.396	148.65		40	200.946	246.083	288.119	214.658	179.18	236.759	261.808	278.729	241.144	283.951	282.398	269.912
	44	153.165	149.412	97.7011	150	159.406	154.703		44	232.177	285.253	327.723	245.928	200.946	271.937	293.877	306.906	269.21	329.63	312.245	301.475
	48	173.418	169.412	112.644	157.143	169.307	163.225		48	265.3	304.147	365.346	268.73	224.29	296.443	341.983	348.619	326.975	347.901	344.643	320.649
	52	188.608	183.529	120.69	170.238	176.238	173.238		52	310.726	358.525	424.752	300.977	235.331	310.277	400.875	406.354	377.384	386.173	375.255	361.947
	56	188.608	205.882	116.092	171.429	185.149	178.289		56	370.662	410.138	497.525	290.228	243.849	316.601	456.268	441.989	428.338	408.395	413.52	376.991
	60	194.937	202.353	125.287	166.667	179.208	172.937		60	425.236	448.387	542.079	297.394	259.937	327.273	523.324	519.613	477.657	448.148	435.459	407.964
	64	192.405	223.529	132.184	166.667	179.208	172.937		64	487.066	502.765	605.446	299.674	264.038	332.411	573.47	565.47	550.409	482.222	471.684	438.053
	68	205.063	237.647	120.69	161.905	178.218	170.061		68	555.205	573.733	698.02	315.961	276.656	330.04	650.146	662.155	631.607	517.284	517.347	476.401
	72	229.114	250.588	129.885	164.286	184.158	174.222		72	645.11	657.143	782.178	329.968	281.388	341.502	746.064	736.74	718.529	570.864	564.286	525.959
	76	226.582	241.177	134.483	166.667	180.198	173.432		76	708.202	768.203	896.039	327.362	284.543	327.668	838.484	843.923	814.714	620.247	611.225	565.782
	80	217.721	264.706	151.724	161.905	170.297	166.101		80	788.013	806.913	974.257	334.202	279.811	339.921	952.187	934.807	916.349	667.408	666.327	597.64
	84	241.772	271.765	154.023	176.19	172.277	174.234		84	885.489	874.194	1077.23	340.065	285.804	350.198	1086.01	1051.38	1034.88	712.84	725.51	633.038
	88	253.165	272.941	157.471	172.619	179.208	175.913		88	985.173	978.341	1212.38	343.323	283.281	355.731	1185.42	1131.49	1128.07	761.481	787.755	707.08
	92	240.506	288.235	164.368	153.571	160.396	156.984		92	1268.14	674.194	867.327	308.469	227.76	284.585	1032.36	1227.07	1277.38	772.84	873.214	790.855
	96	254.43	252.941	164.368	153.571	159.406	156.489		96	1245.74	820.277	1125.74	322.476	247.319	301.186	1162.39	1426.8	1409.81	820.247	940.561	818.584
	100	275.949	250.588	174.713	157.143	171.287	164.215		100	1301.89	956.682	1263.86	353.746	265.615	318.577	1310.79	1624.86	1540.87	909.877	1009.44	884.366
	104	284.81	251.765	177.011	169.048	164.357	166.702		104	1433.44	1115.67	1473.27	371.01	273.186	328.854	1502.92	1775.14	1755.86	979.012	1136.22	954.572
	108	297.468	251.765	197.701	160.714	167.327	164.02		108	1568.14	1295.39	1818.32	396.743	278.549	344.269	1676.97	1985.91	1917.98	1070.37	1229.59	1049.85
	112	334.177	248.235	205.747	164.286	172.277	168.281		112	1703.15	1558.99	1836.63	400.652	292.429	377.866	1782.51	2148.34	2037.33	1198.77	1345.41	1142.77
	116	340.506	265.882	235.632	172.619	170.297	171.458		116	2033.75	1736.41	2028.71	445.928	325.552	422.134	1945.48	2288.95	2210.63	1338.52	1510.97	1288.5
	120	393.671	260	234.483	197.619	172.277	184.948		120	2298.11	1939.63	2218.81	487.622	348.265	473.518	2135.57	2482.32	2393.46	1484.94	1677.55	1427.43
	124	411.392	278.824	267.816	192.857	177.228	185.042		124	2552.05	2223.04	2543.56	516.613	373.817	487.352	2305.25	2633.98	2592.64	1596.05	1792.86	1632.15
	128	467.089	283.529	272.414	195.238	184.158	189.698		128	2737.54	2347.01	2817.82	539.739	402.524	530.435	2434.69	2803.59	2752.86	1757.28	1956.38	1735.4
	132	505.063	305.882	267.816	209.524	193.069	201.297		132	2894.95	2522.12	3014.36	568.078	423.344	581.028	2587.46	2942.82	2917.17	1886.91	2085.2	1852.8
	136	543.038	324.706	304.598	217.857	191.089	204.473		136	3079.5	2639.63	3194.55	602.606	451.42	630.04	2672.89	3069.61	3047.41	1934.57	2125.51	1956.93
	140	546.836	374.118	356.322	219.048	198.02	208.534		140	3260.25	2724.89	3304.45	640.717	487.382	661.265	2882.51	3222.93	3189.92	2044.44	2229.08	2078.47
	144	577.215	358.824	378.161	215.476	207.921	211.698		144	3580.44	2975.58	3400	673.29	508.833	692.886	2987.46	3321.55	3304.9	2169.38	2347.7	2180.53
	148	616.456	368.235	412.644	228.571	219.802	224.187		148	3757.73	3056.22	3898.02	704.235	524.921	714.625	3101.17	3466.85	3439.78	2225.93	2446.94	2302.36
	152	734.177	421.176	473.563	221.429	218.812	220.12		152	3929.02	3216.59	3771.78	715.31	548.58	766.008	3222.45	3580.39	3540.6	2338.02	2519.13	2381.12
	156	730.38	441.176	527.586	230.952	240.594	235.773		156	3949.21	3304.15	4129.7	745.277	568.77	811.067	3344.61	3723.76	3709.26	2410.12	2557.14	2522.71
	160	778.481	498.824	558.62	226.19	244.554	235.372		160	4183.6	3649.31	4344.06	803.909	627.445	866.798	3567.35	3754.97	3794.28	2477.04	2665.05	2594.69
	164	837.975	557.647	603.448	232.143	245.544	238.844		164	4271.61	3663.13	4638.12	841.368	640.379	923.32	3643.15	3837.57	3855.86	2551.85	2727.04	2703.84
	168	893.671	623.529	631.034	244.048	245.544	244.796		168	4340.69	3977.42	4743.07	884.039	667.508	964.427	3700.87	3883.43	3971.66	2627.9	2818.37	2766.96
	172	1027.85	651.765	670.115	235.714	255.446	245.58		172	4524.61	4038.71	4995.05	913.029	708.833	1026.88	3807.87	3943.09	4001.91	2672.59	2845.66	2802.95
	176	1145.57	700	754.023	234.524	269.307	251.915		176	4706.94	4150.23	5044.55	946.58	745.426	1105.14	3863.27	4024.03	4044.14	2694.82	2905.1	2901.77
	180	1236.71	738.823	781.609	216.667	260.396	238.531		180	4780.44	4201.38	4959.41	996.091	778.549	1185.77	3891.84	4024.03	4114.44	2791.6	2977.3	2925.07
Figure 3B
	Hours	Media			Tram 5nM			CQ 20uM			Tram 5nM + CQ 20uM
	0	100	100	100	100	100	100	100	100	100	100	100	100
	24	151.312	159.392	151.226	161.975	163.01	157.817	149.762	140.552	163.125	124.248	141.144	118.299
	36	228.863	235.912	211.717	264.197	253.316	234.808	277.143	222.081	250.938	200.708	198.893	187.113
	40	261.808	278.729	241.144	283.951	282.398	269.912	294.524	246.921	281.875	218.938	229.52	199.742
	44	293.877	306.906	269.21	329.63	312.245	301.475	338.81	266.03	307.187	246.903	261.993	236.598
	48	341.983	348.619	326.975	347.901	344.643	320.649	369.762	294.268	330.625	277.345	279.336	251.289
	52	400.875	406.354	377.384	386.173	375.255	361.947	417.381	321.868	355.937	303.363	291.882	271.134
	56	456.268	441.989	428.338	408.395	413.52	376.991	453.81	349.894	383.75	317.876	314.576	283.248
	60	523.324	519.613	477.657	448.148	435.459	407.964	494.524	385.138	416.563	341.239	339.852	308.247
	64	573.47	565.47	550.409	482.222	471.684	438.053	530.952	410.828	435.938	359.469	357.749	335.052
	68	650.146	662.155	631.607	517.284	517.347	476.401	579.524	441.826	458.438	397.345	376.568	368.041
	72	746.064	736.74	718.529	570.864	564.286	525.959	642.857	483.227	505.312	421.062	415.498	390.979
	76	838.484	843.923	814.714	620.247	611.225	565.782	692.619	522.93	537.813	444.425	438.561	422.165
	80	952.187	934.807	916.349	667.408	666.327	597.64	738.571	563.907	574.688	475.752	470.664	448.196
	84	1086.01	1051.38	1034.88	712.84	725.51	633.038	803.333	600.637	620.625	518.407	510.332	487.629
	88	1185.42	1131.49	1128.07	761.481	787.755	707.08	885.238	651.38	664.062	560	544.649	509.021
	92	1032.36	1227.07	1277.38	772.84	873.214	790.855	1013.1	718.047	777.188	598.407	486.531	551.031
	96	1162.39	1426.8	1409.81	820.247	940.561	818.584	1110.48	772.612	817.188	611.504	528.413	571.134
	100	1310.79	1624.86	1540.87	909.877	1009.44	884.366	1175.24	833.121	873.75	655.044	561.07	620.103
	104	1502.92	1775.14	1755.86	979.012	1136.22	954.572	1287.62	891.295	925.938	703.363	599.816	661.856
	108	1676.97	1985.91	1917.98	1070.37	1229.59	1049.85	1395	953.079	991.875	770.089	643.173	689.691
	112	1782.51	2148.34	2037.33	1198.77	1345.41	1142.77	1551.43	1057.75	1101.25	838.584	706.458	770.361
	116	1945.48	2288.95	2210.63	1338.52	1510.97	1288.5	1710	1198.09	1261.56	943.54	809.594	867.268
	120	2135.57	2482.32	2393.46	1484.94	1677.55	1427.43	1886.19	1349.26	1459.69	1069.56	922.509	971.392
	124	2305.25	2633.98	2592.64	1596.05	1792.86	1632.15	2083.81	1470.91	1592.81	1205.84	1029.89	1069.07
	128	2434.69	2803.59	2752.86	1757.28	1956.38	1735.4	2235.95	1569.85	1740.62	1289.2	1121.96	1194.07
	132	2587.46	2942.82	2917.17	1886.91	2085.2	1852.8	2367.38	1711.46	1852.81	1367.08	1223.98	1299.23
	136	2672.89	3069.61	3047.41	1934.57	2125.51	1956.93	2537.14	1820.81	2001.25	1465.49	1291.33	1375.52
	140	2882.51	3222.93	3189.92	2044.44	2229.08	2078.47	2704.52	1959.45	2176.88	1563.01	1353.87	1484.79
	144	2987.46	3321.55	3304.9	2169.38	2347.7	2180.53	2856.9	2118.26	2311.25	1646.19	1395.02	1537.89
	148	3101.17	3466.85	3439.78	2225.93	2446.94	2302.36	3004.52	2211.04	2459.38	1709.2	1467.71	1625
	152	3222.45	3580.39	3540.6	2338.02	2519.13	2381.12	3109.05	2285.14	2571.56	1772.57	1525.65	1673.45
	156	3344.61	3723.76	3709.26	2410.12	2557.14	2522.71	3189.28	2344.8	2663.44	1812.39	1552.95	1746.65
	160	3567.35	3754.97	3794.28	2477.04	2665.05	2594.69	3252.38	2444.59	2788.12	1858.41	1598.71	1785.57
	164	3643.15	3837.57	3855.86	2551.85	2727.04	2703.84	3346.67	2557.54	2877.19	1901.06	1618.63	1834.54
	168	3700.87	3883.43	3971.66	2627.9	2818.37	2766.96	3467.38	2609.77	2992.19	1957.17	1651.66	1848.45
	172	3807.87	3943.09	4001.91	2672.59	2845.66	2802.95	3504.29	2698.3	3134.69	1965.49	1694.1	1876.29
	176	3863.27	4024.03	4044.14	2694.82	2905.1	2901.77	3592.14	2769.22	3213.75	2015.75	1726.02	1902.84
	180	3891.84	4024.03	4114.44	2791.6	2977.3	2925.07	3687.38	2823.78	3277.81	2030.09	1771.22	1943.56
Figure 3D
% Values
794					794R
Media	Trem 7.5	Trem 15	Trem 30		Media	Trem 7.5	Trem 15	Trem 30
96.0545	5.0071	4.2918	4.34289		92.0894	3.12052	2.54391	2.44215
94.6239	4.85382	4.39398	4.70054		106.369	2.50999	3.86674	2.74742
95.1348	4.80272	4.44508	4.54726		101.994	6.30889	3.08661	2.67958
113.784	4.75163	4.70054	4.39398		93.2426	3.18836	2.54391	2.44215
112.149	4.80272	4.80272	4.34289		105.759	2.50999	3.7989	2.74742
111.791	4.75163	4.956	5.21147		101.349	6.41064	3.12052	2.67958
93.2444	5.77349	4.90491	4.54726		92.666	3.59539	2.50999	2.40823
91.6094	5.82458	4.85382	4.64945		105.759	2.50999	3.86674	2.74742
91.6094	5.87567	5.0071	4.80272		100.773	6.44456	3.08661	2.64566
100	5.16037	4.70622	4.61538		100	4.06648	3.15821	2.61551
AM38					AM38R
Media	Trem 7.5	Trem 15	Trem 30		Media	Trem 7.5	Trem 15	Trem 30
116.085	11.3979	8.2036	6.09825		81.8534	23.9547	28.028	16.972
90.8204	8.2036	9.36517	7.33242		84.278	27.6401	18.5237	16.4871
95.3214	12.9951	9.43777	6.82423		132.478	34.5259	23.5668	14.5474
113.907	11.3979	8.42139	6.09825		83.5022	24.3427	28.028	17.1659
89.804	8.2762	9.51037	7.33242		84.278	27.5431	18.1358	16.681
94.7407	12.9225	9.36517	6.96943		132.187	35.6897	23.4698	14.4504
114.27	11.3253	8.49399	6.09825		84.181	24.0517	28.4159	17.069
89.5862	8.42139	9.65556	7.84061		84.6659	28.028	17.9418	16.5841
95.4666	12.9225	9.72816	7.11462		132.575	35.3017	23.2759	14.6444
100	10.8736	9.13124	6.8565		100	29.0086	23.2651	16.0668
	794			794R			AM38			AM38R
Media	113.937	98.3261	87.7372	112.842	94.3099	92.8481	134.515	69.3763	96.1088	89.9284	119.574	90.4975
Trem 5nM	3.1011	2.44565	3.65045	8.72271	13.8628	5.78973	7.16693	8.17534	6.10765	37.3392	57.9835	33.3571
CQ 5uM	98.1199	68.4889	72.192	68.4435	52.229	43.7503	44.812	40.9586	38.6931	62.0946	91.873	88.6116
Trem + CQ	2.2037	2.05543	1.42651	4.31655	3.75921	2.5198	6.79353	4.60387	4.50533	15.2787	10.8151	7.48096
