# Supplementary material for: Autophagy inhibition overcomes multiple mechanisms of resistance to BRAF inhibition in brain tumors
Source: eLife. 2017 Jan 17;6:e19671. doi: 10.7554/eLife.19671 (PMC5241115; doi:10.7554/eLife.19671)
Supplement: Figure 5—source data 1. — (A and B) Quantification of % growth over time for 794R and AM38R cells treated with RNAi to ATG5 #1, ATG5#2, ATG7#1 and ATG7#2 with and without vemurafenib. (E) Percent viable cells following RNAi to ATG5 #1, ATG5#2, ATG7#1 and ATG7#2 with and without vemurafenib. DOI: http://dx.doi.org/10.7554/eLife.19671.013 [file elife-19671-fig5-data1.xlsx]

## Sheet: Sheet1
Figure 5A and B Source Data
		794R			794R			794R			794R			794R			794R					794R			794R			794R			794R			794R			794R
Hours	NT			NT+Vem			ATG5			ATG5+Vem			ATG7			ATG7+Vem					NT					ATG7 #2					NT Vem					ATG7#2 Vem					ATG5 #2					ATG5 #2 Vem
0	100	100	100	100	100	100	100	100	100	100	100	100	100	100	100	100	100	100		0	100	100	100	100	100	100	100	100	100	100	100	100	100	100	100	100	100	100	100	100	100	100	100	100	100	100	100	100	100
4	109.609	111.576	107.061	111.513	113.681	121.398	122.537	112.565	111.438	123.884	114.88	125.756	109.447	109.72	117.34	117.194	124.032	107.976		4	104.814	106.179	107.591	106.776	111.056	102.315	100.241	102.902	95.2381	99.5833	111.752	108.936	107.028	109.571	106.609	101.216	98.0907	100.763	99.7375	94.9062	101.609	107.363	104.773	114.865	100.808	101.311	101.887	104.775	105.123
8	116.537	110.039	112.502	113.375	115.296	112.499	133.386	129.193	121.321	140.133	125.23	140.824	121.66	118.773	112.83	113.222	137.427	122.652		8	112.144	114.109	112.321	118.033	121.491	104.398	99.0361	102.232	97.3809	97.0833	119.937	114.255	114.746	120.572	113.591	102.433	94.5107	97.201	97.6378	100	100	106.888	103.409	114.64	105.252	100.328	105.121	105.899	102.004
12	124.526	131.404	126.215	133.847	131.957	111.937	146.565	133.466	132.851	146.435	143.273	161.764	128.23	124.633	112.021	135.588	139.923	129.106		12	118.818	118.641	122.002	119.454	127.578	106.944	102.891	98.8839	95.9524	94.1667	125.498	116.17	124.078	123.102	123.816	101.703	90.9308	101.527	91.0761	98.9276	105.362	108.789	109.546	118.694	108.485	103.934	103.234	105.337	99.3319
16	131.352	143.724	132.323	144.554	139.225	136.307	161.843	136.954	137.173	145.262	155.655	158.747	137.103	131.945	121.065	130.716	135.81	129.073		16	122.757	124.202	127.283	124.699	131.677	101.157	101.928	97.9911	97.8571	93.5417	132.004	123.936	133.41	127.833	128.055	103.163	94.9881	96.1832	94.4882	94.37	104.29	106.651	111.591	113.288	105.859	105.574	107.547	103.933	103.341
20	153.092	142.885	147.729	170.918	153.944	149.795	164.706	135.698	135.898	162.863	161.56	157.524	148.587	133.347	129.553	149.354	155.594	130.391		20	128.337	128.63	134.983	129.945	141.242	102.083	99.759	102.009	94.0476	89.7917	141.343	133.723	142.512	133.443	134.913	101.947	94.2721	92.1119	89.5013	87.1314	102.949	104.038	110.682	108.108	101.818	97.7049	105.93	109.832	100.223
24	179.498	179.317	175.206	210.166	185.537	166.379	171.114	160.074	153.339	184.099	180.266	184.209	163.46	159.062	174.129	167.169	182.652	165.323		24	135.12	137.796	144.445	137.049	147.329	101.62	95.6626	98.8839	95	89.7917	145.331	140.106	147.581	142.684	143.89	97.5669	87.5895	91.0941	88.7139	87.3995	108.043	102.613	103.864	105.18	98.5859	96.7213	96.7655	95.5056	101.559
28	203.918	208.71	183.763	217.281	210.289	204.332	187.514	174.613	175.274	194.141	192.136	200.789	180.386	159.143	178.692	174.53	189.095	156.879		28	131.729	138.414	139.824	134.863	155.528	91.4352	85.5422	82.3661	80.4762	76.25	146.065	136.277	147.35	151.815	141.895	81.0219	85.4415	81.6794	80.0525	87.1314	92.2252	101.425	90	83.7838	84.0404	89.1803	84.6361	80.3371	72.6058
32	242.717	243.207	230.773	237.349	228.051	224.19	192.086	196.546	173.589	195.893	200.178	230.61	179.325	173.511	199.032	175.303	206.333	184.693		32	137.09	143.563	144.774	143.716	158.509	86.5741	89.1566	80.3572	77.619	77.2917	150.262	140.106	152.074	150.935	153.367	78.3455	85.4415	82.4427	78.7402	87.1314	90.3485	96.4371	89.0909	83.1081	81.2121	86.2295	85.7143	79.4944	74.6102
36	260.16	267.994	247.166	267.88	237.463	239.988	211.632	198.223	184.264	216.369	213.374	226.313	197.475	187.111	208.69	185.918	184.889	177.932		36	142.779	147.168	147.415	150.382	164.596	84.7222	83.3735	78.7947	74.5238	76.4583	148.478	145.638	153.687	155.446	160.723	76.399	82.3389	81.4249	77.1654	84.9866	88.2037	95.7245	86.3637	79.7297	76.7677	76.0656	84.3666	81.1798	69.9332
40	280.591	292.671	262.027	275.139	272.37	261.356	215.654	209.85	198.866	233.554	235.172	233.857	205.824	201.915	220.732	191.49	232.986	193.036		40	141.576	156.437	154.895	156.831	177.019	81.0185	85.0602	78.5714	75	73.75	155.719	150.425	160.599	161.936	161.721	81.0219	81.6229	87.0229	75.3281	85.2547	82.3056	87.1734	79.5455	73.1982	73.1313	75.7377	76.2803	71.6292	65.9243
44	328.243	339.488	328.646	320.016	297.573	309.579	243.691	231.669	217.515	253.728	213.609	244.751	228.753	221.299	249.209	212.358	266.755	217.64		44	146.608	159.629	157.316	161.639	176.77	78.7037	77.5904	74.1071	74.2857	70.2083	154.879	152.66	169.701	164.246	162.594	72.5061	75.4177	77.8626	64.042	79.6247	80.1609	82.4228	76.3636	71.1712	66.0606	70.8197	69.2722	64.0449	59.9109
48	360.153	387.828	341.749	343.82	349.614	329.706	277.364	248.553	258.981	249.133	226.485	262.086	245.204	234.034	281.726	223.033	276.507	220.362		48	148.468	162.41	165.787	166.448	182.112	73.8426	76.3855	75.6697	65	65.2083	155.509	160.213	174.539	168.537	164.214	68.1265	71.1217	72.5191	62.9921	76.4075	75.3351	79.0974	72.0455	67.7928	65.8586	63.9344	66.3073	54.4944	55.4566
52	423.712	437.65	401.794	399.547	380.176	350.06	266.562	275.077	267.461	281.141	253.833	285.534	276.618	222.397	283.89	225.017	300.891	237.78		52	154.267	170.237	168.867	175.082	186.832	71.2963	74.4578	67.1875	63.5714	63.75	155.824	159.042	175.115	172.387	170.2	61.8005	66.8258	64.631	57.4803	71.5818	69.7051	71.0214	66.3637	62.1622	61.2121	60.3279	60.6469	49.1573	50.7795
56	494.911	512.489	460.666	468.22	464.26	369.517	298.456	303.707	277.59	283.133	253.402	290.336	307.748	279.273	343.1	267.602	330.698	246.031		56	157.112	173.636	174.148	180.765	195.155	67.1296	70.8434	62.9464	64.7619	61.0417	157.607	162.766	177.995	175.248	173.691	59.854	64.4391	58.7786	51.9685	63.807	64.6112	66.9834	66.8182	59.9099	56.9697	56.0656	57.4124	44.9438	46.9933
60	530.775	583.711	553.555	495.438	490.521	455.079	336.374	321.672	318.414	287.934	278.635	300.534	318.959	271.962	387.75	294.506	377.682	261.248		60	159.081	174.665	174.808	182.404	200.124	63.1944	68.9156	57.3661	59.2857	58.75	157.293	161.809	182.719	168.647	174.688	50.365	56.0859	54.1985	49.3439	61.126	58.7131	63.1829	60.2273	55.4054	55.9596	51.4754	56.0647	42.4157	46.7706
64	604.938	660.535	575.099	564.388	541.963	484.199	351.749	337.376	346.298	335.725	285.98	315.796	351.672	313.554	439	298.494	370.726	260.285		64	156.893	179.609	179.758	197.268	200	60.8796	63.8554	54.6875	56.4286	50.8333	163.799	163.723	185.254	176.458	173.815	46.2287	52.7446	48.855	47.2441	53.6193	56.5684	58.1948	56.8182	52.4775	53.7374	47.2131	50.4043	38.2022	42.0935
68	706.991	788.806	670.822	645.712	602.873	531.045	364.571	381.569	373.309	347.787	289.535	346.27	395.532	342.238	428.752	334.557	419.286	304.391		68	164.004	183.728	184.379	199.453	201.863	60.6481	58.7952	51.1161	52.8571	51.25	162.854	166.809	188.71	182.948	176.309	45.0122	47.7327	49.6183	44.8819	50.4022	53.6193	59.3824	54.3182	49.0991	51.7172	47.8689	48.7871	37.9213	41.4254
72	786.647	868.385	714.984	684.021	677.755	592.542	426.216	424.805	420.083	329.505	316.587	385.931	425.439	355.65	516.729	326.588	473.937	309.801		72	164.114	188.569	185.919	204.59	212.05	54.8611	56.8675	51.5625	49.7619	48.9583	159.601	172.34	187.442	185.699	180.923	38.6861	43.9141	46.056	40.4199	47.7212	50.9383	57.7197	51.8182	46.3964	47.0707	48.1967	42.3181	37.0787	40.3118
76	903.76	1023.91	844.622	812.052	752.232	640.346	447.929	481.736	450.546	384.459	355.596	395.667	480.484	403.687	558.069	355.364	504.455	360.542		76	170.022	191.967	190.209	213.442	212.795	52.0833	53.0121	46.4286	47.381	46.25	158.342	169.149	199.655	187.019	179.177	38.9294	39.1408	43.0025	39.1076	47.185	46.6488	51.0689	45.6818	43.6937	47.4747	43.2787	43.9353	32.8652	38.3073
80	1027.53	1195.4	1007.15	879.707	888.476	791.237	537.49	525.009	538.432	405.699	381.89	440.879	564.454	481.173	605.3	405.754	586.081	370.971		80	168.053	195.263	194.609	222.295	212.671	46.7593	49.6386	43.5268	41.9048	39.1667	156.453	176.809	204.148	188.339	184.663	33.8199	36.7542	40.7125	35.4331	42.8954	43.6997	48.6936	41.5909	40.5405	43.4344	39.3443	38.0054	30.618	34.5212
84	1221	1366.69	1101.99	1046.02	970.425	825.299	561.943	589.017	588.867	429.51	403.92	468.365	605.499	491.652	697.093	468.681	611.259	370.495		84	171.007	199.897	200.11	231.585	225.963	44.213	45.7831	42.1875	38.5714	37.5	161.175	174.468	206.682	189.769	184.289	33.3333	34.6062	40.9669	33.3333	38.3378	35.9249	48.4561	40.4545	38.5135	40.8081	37.0492	38.2749	28.6517	32.9622
88	1324.22	1551.05	1327.97	1124.99	1148.43	970.657	623.243	657.491	648.885	505.167	414.128	518.199	651.277	580.4	762.036	489.882	620.374	433.38		88	176.587	207.003	208.581	237.268	234.037	45.1389	44.5783	41.7411	38.0952	37.2917	159.077	172.128	202.995	191.859	185.91	29.6837	31.2649	39.4402	30.9711	37.2654	35.6568	45.8432	37.7273	38.0631	38.5859	34.7541	37.7358	30.618	32.5167
92	1478.45	1714.09	1419.41	1342	1259.83	1151.57	695.324	705.814	719.894	524.466	435.663	548.505	770.337	675.183	845.049	553.79	759.461	464.812		92	179.322	222.657	214.082	242.514	234.534	40.7407	44.3374	39.7321	37.619	33.5417	161.07	177.021	216.244	200.44	179.427	27.7372	29.5943	36.1323	28.084	32.4397	32.4397	41.3302	32.7273	36.036	35.5555	35.082	38.814	29.2135	28.0624
		AM38R			AM39R			AM38R			AM39R			AM38R			AM39R					AM38R			AM39R			AM38R			AM39R			AM38R			AM39R
	NT			NT+Vem			ATG5			ATG5+Vem			ATG7			ATG7+Vem					Media-NT					Vem (1 uM)- NT					ATG7 #2Media					ATG7 #2 Vem 1uM					ATG5 #2Media					ATG5 #2Vem
0	100	100	100	100	100	100	100	100	100	100	100	100	100	100	100	100	100	100		0	100	100	100	100	100	100	100	100	100	100	100	100	100	100	100	100	100	100	100	100	100	100	100	100	100	100	100	100	100
4	110.971	117.922	119.691	106.317	110.947	115.863	100.529	104	105.225	101.591	104.169	106.558	114.978	112.953	112.867	117.046	120.461	120.227		4	110.891	109.645	105.381	110.861	106.639	110.697	111.903	109.818	108.425	107.945	102.982	103.1	101.943	108.707	102.683	104.283	106.271	107.831	107.735	102.881	93.086	100.483	98.4848	94.1559	97.1605	98.6111	100.513	102.174	100.442
8	129.834	141.056	145.486	125.869	135.357	138.78	115.485	116.394	116.279	115.326	110.785	115.984	135.044	139.238	134.738	139.117	141.635	144.691		8	126.337	125.205	121.973	127.341	120.672	121.949	124.902	127.63	120.596	122.873	114.058	108.6	109.879	119.349	109.991	116.833	116.125	114.671	118.161	117.49	93.2546	100.483	99.5455	102.468	102.469	108.796	104.444	106.187	106.342
12	149.473	156.785	162.899	143.079	153.315	157.876	129.968	126.315	125.683	124.079	119.879	126.343	156.316	151.905	152.631	157.363	160.997	163.124		12	142.772	145.587	134.305	143.914	134.37	138.51	141.66	138.64	138.809	134.35	124.814	121.2	117.166	125.594	118.409	118.327	120.045	124.122	127.018	122.84	94.941	105.958	101.515	104.416	105.432	102.778	104.786	105.184	111.357
16	164.443	178.594	180.204	163.182	168.387	172.228	134.989	128.789	134.181	129.76	124.795	134.79	168.176	168.803	173.461	171.252	180.559	188.71		16	160.99	165.514	155.306	160.955	153.529	158.796	155.051	154.488	157.447	153.13	130.884	119.9	120.081	132.454	125.439	129.582	128.667	123.672	134.865	129.835	102.024	110.95	109.546	108.312	105.185	111.728	108.547	106.02	112.094
20	179.013	192.82	190.388	170.625	188.411	190.795	136.839	137.936	144.153	136.447	137.634	137.508	180.856	180.708	186.541	186.149	192.733	196.127		20	180	177.161	178.55	182.584	168.151	173.772	169.851	174.053	174.213	169.502	137.593	129.3	131.822	132.894	130.805	130.179	126.652	120.252	134.865	123.663	97.8078	107.085	115.758	109.221	98.7654	106.636	110.769	105.518	111.947
24	196.936	218.235	222.357	207.875	220.109	224.379	145.983	145.144	152.08	147.502	150.086	154.296	211.12	204.305	204.88	211.663	238.216	234.243		24	196.04	198.18	198.206	201.405	192.773	198.257	198.982	196.283	198.468	185.474	134.505	130.7	133.927	133.861	129.972	134.761	124.972	123.582	140.359	130.967	98.9882	104.509	109.697	104.546	94.4444	102.932	105.641	106.187	108.85
28	220.112	245.814	238.389	219.157	238.397	253.676	151.912	150.716	159.686	160.257	163.416	168.207	226.659	217.171	225.812	229.569	248.333	246.584		28	221.386	226.934	224.738	230.805	217.647	229.081	220.987	227.77	230.979	206.18	133.12	127.2	132.956	139.138	132.1	139.044	131.243	132.043	141.48	131.687	86.8465	104.67	105.606	101.299	91.9753	97.3765	101.368	93.6455	110.62
32	241.18	260.247	258.533	242.701	269.021	275.361	163.011	157.254	164.526	168.291	174.591	179.63	234.926	237.418	243.313	240.148	264.105	259.865		32	260.396	259.418	249.103	260.861	249.832	258.716	253.25	253.366	261.872	236.758	137.061	124.7	131.336	136.588	129.972	145.618	128.22	134.023	151.345	135.803	79.9326	92.4316	98.7879	91.6883	88.2716	84.7222	94.188	90.1338	94.3953
36	268.678	299.967	288.676	274.94	291.879	311.079	169.421	160.375	172.95	176.609	180.464	188.251	249.082	246.309	254.783	257.208	273.354	276.101		36	296.931	297.27	290.135	313.764	288.235	287.797	285.2	290.533	290.213	274.077	139.191	124.4	133.198	136.939	133.395	147.012	132.363	130.693	151.57	135.494	74.0304	88.0837	87.1212	79.4805	82.2222	75.6173	81.3675	85.9532	85.5457
40	296.797	318.866	316.232	310.275	318.341	332.956	177.136	169.904	178.553	187.469	187.329	201.252	286.33	256.52	274.262	274.275	287.86	287.752		40	341.089	339.217	332.96	350.655	324.538	338.51	333.125	327.84	331.319	312.119	138.445	126	131.741	139.226	140.611	147.709	135.722	128.533	147.982	134.774	66.4418	80.3543	82.2727	79.0909	76.4197	61.4198	64.9573	71.9064	71.6814
44	318.097	347.989	339.523	335.276	342.914	340.906	185.163	175.209	190.084	195.32	202.102	207.426	290.789	280.01	294.556	290.489	306.982	304.353		44	390.198	384.167	376.756	398.689	370.168	362.916	367.189	360.028	365.617	341.573	141.214	124.2	128.259	142.48	136.263	145.319	130.683	132.943	149.44	133.025	57.5042	71.3366	66.8182	69.6104	67.037	51.6975	57.7778	63.8796	61.5044
48	345.89	380.02	379.642	354.831	368.249	377.813	200.616	181.31	206.445	205.107	218.541	213.348	315.179	314.377	328.413	311.477	322.017	329.039		48	447.03	437.489	427.504	456.929	421.681	393.502	405.638	395.792	386.468	365.891	139.404	122.8	125.02	138.259	132.933	140.637	132.251	124.752	154.036	127.572	52.4452	60.3865	57.2727	58.5714	57.6543	43.3642	51.6239	56.1873	49.5575
52	386.625	428.791	425.96	381.625	395.849	409.81	210.86	190.01	218.869	215.304	215.62	224.827	332.664	336.961	350.803	334.31	349.08	342.244		52	504.356	502.73	482.063	533.146	477.899	427.338	444.401	421.739	421.021	406.099	134.185	124.9	120.729	135.004	132.285	135.159	131.243	121.332	150.336	125.514	46.7116	55.0725	51.8182	50.7792	50.6173	38.1173	46.1538	46.6555	41.0029
56	421.591	466.147	453.679	395.512	425	430.786	221.898	201.123	224.631	226.199	227.596	231.976	362.95	351.351	370.225	356.68	379.256	364.447		56	576.04	584.895	538.49	614.419	542.689	459.033	475.098	466.129	460.766	435.875	134.824	122.4	112.551	132.278	139.315	141.932	125.196	115.121	151.794	120.165	36.0877	41.5459	46.3636	41.1688	41.2346	30.4012	37.7778	40.9699	35.2507
60	459.173	513.666	504.232	428.617	449.49	464.543	234.49	213.279	236.092	231.267	239.384	240.046	403.042	387.386	408.377	400.768	414.525	400.955		60	649.604	654.231	612.257	689.888	612.017	498.891	522.005	513.114	503.83	480.016	134.292	118.2	107.287	128.496	133.21	135.657	116.797	112.961	140.695	115.844	29.0051	37.5201	38.7879	35.1948	39.0123	25.7716	31.453	34.4482	27.4336
64	496.002	572.526	554.71	459.307	487.764	519.339	248.196	226.933	242.124	241.217	247.821	246.567	432.778	433.037	433.903	418.182	443.635	445.223		64	734.653	723.84	690.807	768.446	695.462	546.514	564.605	548.597	551.915	525.682	137.7	113.8	107.287	115.743	126.827	130.179	114.446	111.701	135.538	111.317	23.7774	30.2737	33.1818	31.6883	30.8642	19.1358	27.6923	26.087	25.3687
68	551.781	624.927	615.645	497.047	533.565	550.307	256.79	245.685	251.155	252.175	247.697	255.227	470.784	466.547	472.84	469.604	496.478	487.121		68	828.416	825.478	770.105	877.996	794.118	586.767	621.457	585.975	608.511	573.836	131.31	111.4	105.425	115.127	126.734	132.47	106.831	106.571	140.471	110.494	20.4047	23.9936	27.8788	25.3247	25.9259	18.5185	22.906	23.913	21.8289
72	599.205	662.633	657.56	544.129	566.201	603.488	271.618	256.588	262.676	259.553	255.031	256.392	498.018	499.497	509.598	503.041	550.623	515.278		72	931.386	919.654	874.514	992.229	881.26	641.838	674.002	636.466	649.617	623.435	127.796	108.8	108.259	108.707	125.439	130.777	105.151	104.23	131.502	110.185	19.3929	20.934	22.4242	19.4805	20.7407	14.9691	21.1966	19.7324	21.5339
76	644.629	729.818	718.251	581.744	625.379	638.479	284.23	272.838	276.581	261.028	262.659	269.234	546.72	548.796	567.56	553.613	610.376	573.79		76	1037.53	1027.3	963.602	1092.42	975.798	700.951	736.022	689.481	706.638	681.621	131.523	107.7	107.611	105.541	121.184	126.693	97.5364	105.671	128.139	98.0453	15.3457	17.3913	20.9091	18.961	19.1358	12.1914	16.9231	17.0569	18.4366
80	705.826	801.473	777.722	646.752	662.126	696.027	295.955	279.077	290.565	266.229	264.538	274.746	594.184	614.037	610.857	622.107	642.409	630.37		80	1178.42	1150.59	1061.21	1215.08	1080.5	750.555	801.488	755.61	774.723	731.3	135.889	105.9	103.887	105.541	121.924	130.08	102.352	103.78	117.713	99.0741	13.4907	14.0097	16.2121	14.9351	14.0741	8.7963	16.2393	15.2174	16.8142
84	780.753	871.779	841.4	703.257	713.802	755.232	315.885	296.276	309.902	286.366	278.771	286.599	665.232	672.324	651.271	662.495	709.269	687.551		84	1303.56	1248.59	1178.03	1342.04	1184.62	810.777	840.955	812.272	836.766	795.104	137.913	103.7	101.134	100.879	120.259	129.681	100.672	104.591	122.421	95.0617	13.1535	15.4589	13.4848	14.9351	15.0617	8.48766	13.5043	14.5485	15.3392
88	826.986	930.438	906.849	748.933	766.282	805.455	328.075	314.877	333.544	286.186	290.287	286.604	714.777	714.578	721.75	741.711	758.883	729.745		88	1440	1359.14	1283.63	1460.3	1290.84	882.805	918.246	857.433	901.532	859.149	138.765	102.9	100.162	95.8663	127.105	128.984	101.12	107.381	118.049	94.2387	11.6357	12.8825	11.8182	14.026	12.8395	7.25309	14.5299	14.0468	14.1593
92	886.565	998.267	978.511	795.355	836.887	868.549	334.415	333.257	354.21	288.913	304.327	298.585	779.524	779.276	789.413	804.063	831.455	804.408
Figure 5E Cell Titer Glo
	NT									NT + Vem									ATG5 #1									ATG5 #1 + Vem									ATG7 #1									ATG7 #1+ Vem
AM38R	97.3351	103.168	99.4966	104.482	103.693	91.8242	103.868	97.8197	98.3122	64.1018	62.0783	60.3327	75.3105	80.3674	69.1717	69.5489	82.4018	66.107	29.8219	30.0581	31.1633	12.3691	13.1637	17.0695				15.8613	14.9879	13.9683	10.985	11.5949	14.3638				43.0516	46.9619	42.8936	41.095	36.1542	34.4188	22.9155	24.7415	24.5512	30.361	28.0383	29.1197	32.8293
	NT									NT + Vem									ATG5 #1									ATG5 #1 + Vem									ATG7 #1									ATG7 #1 + Vem
794R	100.165	102.314	97.5213	111.582	108.382	102.866	94.8921	112.627	89.6146	83.3025	97.8116	87.1213	92.1807	76.6477	83.9662	87.8008	83.6604	64.7789	44.9425	56.7243	48.4949	21.4362	24.5677	26.4456	29.2363	22.799	34.8259	32.8175	27.1867	28.5157	18.2901	15.8475	17.6717	22.2598	24.021	25.0682	74.9366	64.1112	74.8434	49.6465	40.0434	43.599				34.9239	37.2645	36.8788	49.6465
[truncated: 38 more columns]
