# Supplementary material for: Autophagy inhibition overcomes multiple mechanisms of resistance to BRAF inhibition in brain tumors
Source: eLife. 2017 Jan 17;6:e19671. doi: 10.7554/eLife.19671 (PMC5241115; doi:10.7554/eLife.19671)
Supplement: Figure 6—source data 1. — (A) Densitometry quantification of Western blotting of slice culture samples. (B) Normalized LDH measures of Patient #1 slice culture samples. (C) EdU quantification by flow cytometry of Patient #1 slice culture samples. (D) LDH and cell viability of Patient #1 cell line treated with increasing doses of CQ. (F) Quantification of long-term clonogenic growth assays in Patient #1 cell line treated with vemurafenib, CQ or a combination of the two drugs. (H) Quantification of autophagy flux in Patient #1 slice culture samples. (I) Quantification of phosphorylated to total protein for AKT, MEK and ERK in Patient #1 slice culture samples. DOI: http://dx.doi.org/10.7554/eLife.19671.015 [file elife-19671-fig6-data1.xlsx]

## Sheet: Sheet1
Figure 6A
	DMSO			Vem 1			CQ10			Vem 1+ CQ10			CQ20			Vem 1 + CQ20			Cisplat
pERK:ERK	1	1	1	2.31567	2.63906	2.23063	1.85438	1.86907	0.538097	1.9217	2.12558	1.97359	0.850906	1.19594	0.411631	1.66034	1.34552	1.2948	0.88396	0.900647	0.465705
LC3II	1	1	1	0.98284	3.57242	1.31042	5.24017	6.03458	4.61933	6.07658	8.46987	10.6471	6.31424	8.41882	8.08455	8.5641	14.1078	18.1352	1.78432	1.03436	1.32059
Figure 6B Source Data		DMSO			MMC			Cisplat			Vem			CQ-10			Vem+CQ10			CQ20			Vem+CQ20
LDH	Normalized	1	1	1	368.271	368.271	368.271	9.91729	9.91729	9.91729	15.8571	7.16993	7.69925	20.6541	17.4286	21.2932	88.1203	13.6767	36.6767	21.6391	11.3609	9.14286	28.4361	92.5564	54.5714
Figure 6C Source Data
EdU	No Edu			DMSO			MMC			Cisplat			Vem			CQ10			Vem+CQ10			CQ20			Vem+CQ20
	0	0		100	92.5		19.5	19.5		10	10		13.75	6.5	47.5	27.5	0	6.5	77.5	0	75	10.75	0	0	0	16.75	0
Figure 6D LDH						Figure 6D Cell Titer
	905_3						905_3
0	0.0406977	-0.0406977	0.0670732	-0.0670732		0	103.088	96.9121	98.1	101.9
6.25	0.0357143	-0.0585714	0.100352	0.0862676		6.25	87.0712	80.5225	76.17	69.88
12.5	0.147388	-0.016791	0.320652	0.240942		12.5	20.1524	19.2318	38.74	21.97
25	0.708145	0.395928	0.774272	0.643204		25	1.47036	1.34125	1.26	1.49
50	0.619681	0.449468	1.08373	1.26555		50	0.0312064	0.139725	0.08	0.12
Figure 6F
Media																		Vem2uM																		CQ5uM
105.283	106.082	105.483	95.8935	95.4939	95.394	98.6903	98.5905	99.0899	80.5219	81.9898	79.8928	105.685	104.532	103.169	115.96	115.75	112.5	71.6204	71.4206	71.5205	78.0133	80.7103	79.1121	67.525	67.3252	67.2253	68.15	65.1095	67.8355	61.4399	61.2302	61.4399	64.3756	63.8513	64.1659	40.7547	42.6526	36.3596	42.2531	42.2531	42.0533	28.1687	27.7691	28.2686	32.8169	32.2926	32.9217	40.4706	40.6803
Figure 6H Autophagy Flux
Ratios	Set 1	Set 2	Set 3
DMSO	1.79763	2.01867	1.68548
Vnib	1.76678	7.21154	2.2087
CQ10	9.41989	12.1818	7.7858
Vni+CQ10	10.9235	17.0979	7.7858
CQ20	11.3507	16.9948	13.6264
Vnib+CQ20	15.3951	28.479	30.5665
Cisplat	3.20755	2.08802	2.22584
Flux	Set 1	Set 2	Set 3
DMSO:CQ10	7.62226	10.1631	6.10032
DMSO:CQ20	9.55305	14.9761	11.9409
Vnib:VnibCQ10	9.15667	9.88632	5.5771
Vnib:VnibCQ20	13.6283	21.2674	28.3578
Figure 6I Ratios
	pAKT	total AKT	pAKT:AKT			pMEK	total MEK	pMEK:MEK			pERK	total ERK	pERK:ERK
DMSO	6505.33	4196.38	1.55022		DMSO	3101.15	1731.01	1.79153		DMSO	3792.81	8598.95	0.441078
VEM 1	2081.3	4659.62	0.446668		VEM 1	7455.59	2624.08	2.84122		VEM 1	11063	6518.71	1.69712
CQ10	4397.67	1544.41	2.84748		CQ10	5230.74	3432.2	1.52402		CQ10	3102.22	5823.47	0.532711
VEM1+CQ10	7822.28	4809.2	1.62652		VEM1+CQ10	9716.3	5027.98	1.93244		VEM1+CQ10	13640	7404.3	1.84217
CQ20	10410.3	4402.67	2.36455		CQ20	8159.18	5975.45	1.36545		CQ20	5610.18	9093.08	0.616972
VEM1+CQ20	9614.1	6339.96	1.51643		VEM1+CQ20	9188.17	6679.86	1.3755		VEM1+CQ20	11942.7	7076.05	1.68776
[truncated: 22 more columns]
