# Supplementary material for: Autophagy inhibition overcomes multiple mechanisms of resistance to BRAF inhibition in brain tumors
Source: eLife. 2017 Jan 17;6:e19671. doi: 10.7554/eLife.19671 (PMC5241115; doi:10.7554/eLife.19671)
Supplement: Figure 7—source data 1. — (A) Normalized LDH release of Patient #2 slice culture samples. (C) EdU quantification by flow cytometry of slice culture samples. (D) LDH and cell viability of Patient #5 cell line treated with increasing doses of CQ. (E) Normalized LDH release of Patient #5 cell line treated with vemurafenib, CQ, or a combination of the two drugs. (G) Quantification of long-term clonogenic growth assays in Patient #5 cell line treated with vemurafenib, CQ, or a combination of the two drugs. DOI: http://dx.doi.org/10.7554/eLife.19671.018 [file elife-19671-fig7-data1.xlsx]

## Sheet: Sheet1
Figure 6A
DMSO			MMC			Vem			CQ-20			Vem+CQ10			Vem + CQ20
1	0.85	1.15	12.8596	12.8596	12.8596	0.41573	1.55524	3.87079	0.461423	10.1498	6.5206	2.39513	0	2.3015	5.17228	8.50562	8.32023
Figure 6C
No Edu	DMSO	MMC	Vem	CQ20	Vem+CQ	Vem+CQ20
0	96.9697	18.1818	172.727	209.091	387.879	87.8788
0	103.03	18.1818	303.03	15.1515	0	0
0			203.03	45.4545		87.8788
Figure 6D
LDH	B76					CellTiter Glo	B76
0	0.10523	0.108977	0.0743308	0.0743308		0	106.561	93.4386	102.514	100.171
6.25	0.113804	0.155144	0.0645094	0.0744659		6.25	76.5192	63.0822	95.8192	88.6076
12.5	0.11776	0.19235	0.0827202	0.0880714		12.5	67.9842	56.8778	89.3025	78.6819
25	0.343126	0.46177	0.230345	0.286046		25	43.7938	30.631	28.986	47.986
50	0.27727	0.317489	0.575569	0.646998		50	0.208819	0.137405	0.0276674	0.265219
Figure 6E LDH with combined therapy
DMSO						V1						V2						C10						C20						V1C10						V1C20						V2C10						V2C20
0	0.495644	0	0.846824	1.5308	3.12674	1.63893	1.756	1.52186	3.33624	1.77238	6.20333	0.670693	1.76819	0.30486	1.43309	3.45244	5.53693	0	0	0	0	0	0.283552	0	0	0	0	0	0.908624	0.320939	1.01631	0	1.51753	1.41287	4.29094	0	0.10726	0	0	1.5759	3.99602	0	0.587009	0.880514	0.724122	1.99134	6.27573	1.95934	7.54922
Figure 6G Patient 5 Clonogenics	Media									Vem									CQ									Vem+CQ
Vem1uM	102.389	107.485	93.308	98.59	108.597	92.381	98.96	106.744	91.547	69.958	82.745	77.371	70.143	81.818	77.741	69.772	83.301	76.629	65.695	67.827	76.537	63.657	64.398	73.664	64.028	65.51	78.204	38.917	48.831	40.121	39.566	48.831	40.863	40.492	49.573	41.697
Vem2uM	104.973	107.719	92.36	100.802	108.024	87.986	101.006	110.567	86.562	71.101	77	62.963	68.965	77.204	61.132	68.456	75.678	59.607	84.019	94.191	88.393	82.9	92.868	88.698	82.595	93.784	88.189	19.123	20.75	28.481	18.92	20.547	28.176	19.326	21.056	29.091
[truncated: 4 more columns]
