# Supplementary material for: Autophagy inhibition overcomes multiple mechanisms of resistance to BRAF inhibition in brain tumors
Source: eLife. 2017 Jan 17;6:e19671. doi: 10.7554/eLife.19671 (PMC5241115; doi:10.7554/eLife.19671)
Supplement: Figure 9—source data 1. — (A–B) Quantification of % growth over time for 794 and AM38 parental and EGFRoe cells treated with vemurafenib, CQ or a combination of the two drugs. (C) 794 and AM38 EGFRoe percent viable cells treated with vemurafenib, CQ or a combination of the two drugs. DOI: http://dx.doi.org/10.7554/eLife.19671.027 [file elife-19671-fig9-data1.xlsx]

## Sheet: Sheet1
Figure 9A
794	Hours	Media-Parental			Vem 1uM- Parental			Media-EGFR			Vem 1uM- EGFR				AM38	Hours	Media-Parental			Vem 1uM- Parental			Media-EGFR			Vem 1uM- EGFR
	0	8.72446	9.15375	6.81608	7.50259	6.36641	5.94632	8.67892	9.7271	7.65666	9.66001	9.47362	7.73677			0	4.2172	6.0139	5.70451	4.67256	4.71307	3.95759	4.17566	3.99605	5.71058	5.55242	5.56152	3.215040*
	4	9.81793	9.86072	8.1206	8.56871	7.27122	7.32515	10.6518	11.8081	8.75976	11.4947	10.886	9.03729			4	4.89728	6.54255	6.19103	5.30794	5.37766	4.11712	4.40828	4.69249	6.70476	6.04184	5.76883	3.774176*
	8	11.536	11.5824	8.37233	9.28997	8.05836	7.8067	11.8633	13.4021	10.51	13.6051	12.845	10.8929			8	4.46613	6.55874	5.24474	4.28057	5.28805	3.46275	5.56017	5.37387	7.46608	6.82438	6.89462	4.520405*
	12	12.3391	12.9103	9.52305	10.4298	8.72265	8.57753	13.7182	15.4285	11.9766	15.3066	15.4886	12.7352			12	4.62626	7.18135	5.43628	5.18605	5.54365	3.79761	6.30737	6.40551	8.54897	7.43522	8.08849	4.973803*
	16	13.5938	13.6391	10.6691	11.3299	10.0082	9.51514	15.1802	17.0348	13.4582	17.7511	16.8799	14.1078			16	4.98696	7.74513	5.96128	5.92652	6.09392	4.26695	7.22713	7.20592	9.90215	8.18669	9.21084	5.395425*
	20	15.8002	16.1338	11.2713	12.3532	10.7935	10.8204	17.7244	19.4831	15.1306	19.6104	18.2673	15.233			20	5.3523	8.49792	6.52069	6.51931	6.60631	4.24628	8.23471	7.97542	11.2504	9.30547	10.4344	5.839066*
	24	17.5114	17.8093	12.1388	13.6701	11.6555	11.8066	19.9173	21.6076	17.1918	21.2479	19.7238	15.9835			24	5.84823	9.86321	7.32233	6.85612	6.83096	4.70821	9.37191	9.17532	12.5841	10.3077	11.0002	6.367929*
	28	19.8493	19.0884	13.3508	14.186	12.8213	12.994	23.4266	25.4361	19.2937	22.28	21.9759	17.1617			28	6.31362	10.8415	7.7194	7.46059	7.22715	5.09355	10.7725	10.4422	14.6345	11.4423	12.6137	7.119581*
	32	21.3504	21.2438	14.4514	13.9391	12.5975	13.3052	24.9135	27.9295	21.4978	23.1669	22.9608	18.4332			32	6.34976	12.0802	8.4189	7.47865	7.27877	5.38576	12.1748	12.1079	16.5936	12.6623	13.6324	7.670324*
	36	22.4486	24.138	15.0625	15.0611	13.504	13.7657	28.0146	31.2009	24.5306	25.077	23.5421	19.7758			36	6.79335	13.004	9.17319	7.48542	7.80459	5.77892	14.0701	13.6586	18.6466	13.6115	14.6362	8.312247*
	40	24.7981	24.9392	16.8696	14.8878	14.4266	14.6667	30.2426	33.6062	27.0825	26.9646	25.0532	20.1612			40	7.5077	13.9281	10.4095	7.74765	8.06891	6.02165	15.5851	15.2127	20.6989	15.0092	15.7738	9.159689*
	44	26.8901	27.0586	18.6963	16.14	15.1937	14.5594	33.8734	38.5678	28.5112	27.7395	26.1322	21.1651			44	8.10212	14.8646	10.7945	7.97371	8.71061	6.48443	17.937	17.5482	22.9511	16.1135	17.0821	9.935068*
	48	29.5309	30.674	20.5246	16.1068	15.7217	15.8971	39.0979	42.4845	33.224	30.1067	27.1613	22.5303			48	8.58978	16.4992	12.0341	8.28736	8.90777	6.51605	20.075	19.5851	26.5765	17.723	18.9579	10.667080*
	52	31.891	32.9055	22.1206	16.784	16.3102	15.7692	43.4534	46.8055	37.3991	28.8741	27.8284	23.4852			52	9.80666	18.2366	13.155	8.58123	9.52938	7.01262	23.2151	21.9145	30.1076	18.8067	20.2902	11.570820*
	56	34.5956	35.8698	23.7275	17.6188	16.8298	16.6005	48.0558	51.2754	40.3069	31.7301	29.1693	23.222			56	10.5843	19.8469	14.4151	9.21802	10.163	7.49979	25.4539	25.1339	33.6391	20.6422	22.0247	12.568190*
	60	37.8303	39.203	27.0692	18.0919	17.6793	16.6865	53.4934	57.4029	46.1033	34.3988	31.3251	24.7251			60	11.7022	21.5498	15.9208	9.58477	10.6633	7.70251	28.509	28.2151	36.4341	22.0519	24.5492	13.820750*
	64	40.477	42.0061	28.5975	21.1446	17.7794	18.5483	57.7762	62.0538	51.2508	34.8398	33.5179	27.5043			64	12.579	23.6216	17.2277	10.5415	11.205	8.38431	32.1174	31.17	39.9779	23.3789	25.8758	14.715580*
	68	44.6503	46.3309	32.4649	22.6477	18.2823	17.9996	64.7469	67.1312	54.2621	36.7522	35.0593	28.7249			68	14.0893	26.0994	18.5382	11.2406	11.9975	8.77051	35.7578	33.6609	44.5844	25.4574	27.2098	15.846940*
	72	48.7414	49.3075	35.732	23.6615	19.0594	18.3548	70.4586	73.8748	60.5091	38.1927	37.1403	29.0696			72	15.5711	28.3612	20.5466	11.3589	12.1412	9.16677	39.3191	37.4195	48.4385	27.1963	29.596	17.453590*
Figure 9B
794	Hours	Media			Vem 1uM			CQ 20uM			Vem 1uM + CQ 20uM				AM38	Hours	Media			Vem 1uM			CQ 20uM			Vem 1uM + CQ 20uM
	0	4.66622	6.96361	7.71505	9.44338	7.48213	8.88886	6.18379	8.65464	5.90894	5.58383	7.55264	5.06543			0	4.17566	3.99605	5.71058	5.55242	5.56152	3.21504	4.04632	3.24274	3.48584	3.58361	2.92351	3.74952
	4	5.46398	8.17886	8.85484	10.4646	8.84907	9.89257	7.1	9.58736	6.72706	6.30602	7.86116	5.68701			4	4.40828	4.69249	6.70476	6.04184	5.76883	3.77418	4.38785	3.60257	3.56436	3.71905	2.773	4.06511
	8	6.35327	9.2662	9.5647	11.4338	9.13047	10.948	8.09386	10.7435	7.72446	6.67535	8.79428	6.29232			8	5.56017	5.37387	7.46608	6.82438	6.89462	4.52041	4.53963	3.98501	4.00684	3.78324	2.78684	4.22001
	12	6.75842	10.1114	10.3581	12.3588	9.81983	11.8535	8.9095	11.6483	8.5355	7.06909	9.59276	6.69946			12	6.30737	6.40551	8.54897	7.43522	8.08849	4.9738	5.18136	4.28657	4.39964	4.21176	3.27192	4.718
	16	7.66229	10.8501	12.2448	12.6346	10.1405	12.1177	9.43088	13.0021	9.10382	7.76812	10.2591	7.23699			16	7.22713	7.20592	9.90215	8.18669	9.21084	5.39543	5.66829	4.75153	4.84392	4.81971	3.91017	5.30594
	20	8.39723	12.5699	12.9568	13.6667	10.5663	12.6676	10.1322	13.7154	10.1088	8.15847	10.6631	7.56761			20	8.23471	7.97542	11.2504	9.30547	10.4344	5.83907	6.15523	5.51467	5.21396	5.25836	4.116	5.86949
	24	9.42069	13.6175	15.4975	13.6379	11.0225	12.6617	11.0255	14.7025	10.6193	8.27833	11.0878	7.84272			24	9.37191	9.17532	12.5841	10.3077	11.0002	6.36793	6.93159	6.06165	5.86105	5.84713	4.51146	6.02093
	28	9.94524	15.2252	17.3724	13.9922	10.7426	12.8942	11.9964	16.2404	11.3696	8.68249	11.7492	8.39015			28	10.7725	10.4422	14.6345	11.4423	12.6137	7.11958	7.88895	7.01155	6.66221	6.6529	4.98985	6.90244
	32	11.1109	17.0543	18.6771	14.2821	11.0536	13.4342	12.9136	17.1944	12.3515	8.87565	11.9642	8.55154			32	12.1748	12.1079	16.5936	12.6623	13.6324	7.67032	9.15808	8.24177	7.4197	7.24115	5.64586	7.55068
	36	12.5333	19.0955	19.887	15.3631	11.909	13.5392	13.4158	18.4688	12.9143	8.86785	12.351	8.51343			36	14.0701	13.6586	18.6466	13.6115	14.6362	8.31225	10.0491	9.66482	8.53136	7.48453	5.91521	8.29917
	40	13.7467	20.3456	21.8018	14.599	12.2182	13.9873	14.9674	20.1395	13.6667	8.86104	12.5017	8.69811			40	15.5851	15.2127	20.6989	15.0092	15.7738	9.15969	11.4705	10.4558	10.071	8.01065	6.19762	8.74995
	44	15.6027	22.6955	24.6479	16.2778	12.3114	14.8204	15.4492	21.2548	14.701	9.14009	12.9867	8.9607			44	17.937	17.5482	22.9511	16.1135	17.0821	9.93507	12.5919	11.6989	10.8821	8.54281	6.84019	9.37412
	48	18.1149	25.1892	28.7366	16.4243	12.6338	15.521	16.9161	21.9886	15.4684	9.24156	13.5615	9.61872			48	20.075	19.5851	26.5765	17.723	18.9579	10.6671	14.6441	13.5168	12.4305	9.57071	7.65321	10.1746
	52	19.5212	27.944	31.327	15.9791	13.1378	15.7276	18.367	24.2145	16.7243	9.56978	13.8773	9.65495			52	23.2151	21.9145	30.1076	18.8067	20.2902	11.5708	16.5337	15.5578	13.8819	10.2195	8.15935	10.9497
	56	20.8319	29.8793	35.8326	16.3495	13.4828	16.0836	19.3871	26.0093	18.3249	9.79633	14.2322	9.62044			56	25.4539	25.1339	33.6391	20.6422	22.0247	12.5682	18.2867	16.8905	15.304	10.8958	8.84215	11.9352
	60	23.0548	34.9942	39.735	18.1404	13.3898	16.5884	21.4756	28.3967	18.9744	9.60518	14.8579	10.04			60	28.509	28.2151	36.4341	22.0519	24.5492	13.8208	20.3814	18.4798	17.1839	11.6412	9.50389	12.7114
	64	27.2354	38.9469	43.0455	19.5918	13.8668	17.7913	22.6359	30.9039	20.6378	9.97619	14.9419	10.1887			64	32.1174	31.17	39.9779	23.3789	25.8758	14.7156	22.4737	20.9251	18.947	12.6136	10.5607	13.4107
	68	30.2454	42.8762	48.7261	19.7249	15.1396	18.3645	24.3655	33.9239	21.7134	10.297	15.4417	10.738			68	35.7578	33.6609	44.5844	25.4574	27.2098	15.8469	24.8143	22.9778	20.8434	13.8696	11.006	14.0476
	72	33.6842	49.1207	52.7248	19.9782	16.107	18.7325	26.3859	36.1745	24.2244	10.2521	15.9199	10.8896			72	39.3191	37.4195	48.4385	27.1963	29.596	17.4536	27.5624	26.4122	22.5968	14.7604	11.5901	14.4105
	76	35.9111	50.752	57.9305	23.3251	17.3146	21.6092	28.7898	38.1366	25.6503	10.663	16.1091	11.0501			76	43.3676	41.2396	51.6291	28.1779	31.7441	18.2424	30.6468	28.983	25.0904	15.5706	12.6438	15.3134
	80	40.6843	56.4901	59.7099	23.801	18.217	23.2756	31.3625	40.066	27.3512	10.9338	16.3007	11.3331			80	46.4829	45.2073	54.9782	29.3575	32.9876	19.7162	32.6226	31.3066	27.2982	16.0304	13.4232	16.4803
	84	46.7872	62.5329	67.0009	25.3236	18.4362	23.457	33.0646	44.3971	30.6868	11.0539	17.0687	11.8772			84	49.9435	49.6466	58.8639	30.3555	34.2331	21.4367	35.7653	34.4661	30.6853	17.8919	14.4223	17.2657
	88	51.1033	68.0691	71.2747	25.8559	19.7401	26.5002	35.9896	47.7531	32.8461	11.6803	17.5855	12.2729			88	53.6617	54.3449	62.3052	32.1255	35.9556	23.019	39.8507	38.4113	34.9257	19.4703	15.204	18.2778
	92	55.7687	72.9574	76.4557	26.6472	20.7878	27.347	39.4823	52.2753	36.1354	11.8398	17.9563	12.4686			92	55.9698	57.6935	65.246	33.8374	38.3233	24.8538	43.939	42.3394	38.7343	21.0665	16.1971	19.5479
	96	61.5279	75.9876	81.28	27.8235	22.8526	30.8623	41.1345	56.1529	39.2011	12.15	18.3622	12.455			96	58.979	60.7455	67.398	35.0995	39.1919	26.568	47.0387	45.1173	42.0425	22.1124	16.908	20.2211
	100	64.1039	81.911	85.6696	30.5947	23.3906	28.7039	45.7645	59.81	42.6292	12.3224	18.7336	12.9115			100	61.4935	63.1759	69.5764	36.2328	40.8828	28.0711	50.9799	48.5291	45.8261	23.7179	18.2143	21.05
	104	71.3874	84.9531	87.8704	33.4582	24.1591	31.1965	49.31	64.163	45.6906	12.699	19.3715	13.4375			104	63.2533	65.9228	72.7973	37.0898	42.9948	29.8241	53.623	51.7886	49.0684	25.9662	19.5306	22.4287
Figure 9C
794	NT	Vem 1uM	CQ10	CQ20	Vem +CQ10	Vem+CQ20		AM38	NT	Vem 1uM	CQ10	CQ20	Vem +CQ10	Vem+CQ20
	96	53.2505	115.714	79.9384	25.8951	19.468			100.524	91.0995	104.45	80.1047	84.0314	63.1756
	102.857	42.9903	97.7143	78.9247	25.6005	17.7722			109.948	87.9581	109.162	95.0262	87.9581	54.1082
	101.143	38.3062	101.143	77.9638	31.5747	24.7304			89.5288	87.1728	97.3822	86.3874	76.0004	42.726
	99.8	33.6	94.3	81.7	29.5	18.2			113	75.6	79.3	77.1	69.9	64.4
	102.2	36.4	99.8	82	32.2	21.1			95	68.4	73.2	79.3	81.5	60.2
	98	32	102.3	84.1	29.3	24.3			92	80.8	89	87.5	85.3	74.8
